# Supplementary material for: Response of Fungal Diversity, Community Composition, and Functions to Nutrients Management in Red Soil
Source: MDPI journal article supplement (doi:10.3390/jof7070554), 2021-07-12
Supplement: s1 [file s1]

# Response of Fungal Diversity, Community Composition, and Functions to Nutrients Management in Red Soil

Muhammad Atif Muneer<sup>1†</sup>, Xiaoman Huang<sup>1†</sup>, Wei Hou<sup>1</sup>, Yadong Zhang<sup>1</sup>, Yuanyang Cai<sup>2</sup>, Muhammad Zeeshan Munir<sup>3</sup>, Liangquan Wu<sup>1</sup>, Chaoyuan Zheng<sup>1\*</sup>

**Table S1.** Amount of fertilizer applied during different growth periods of pomelo tree.

|                  |           | Amount of Fertilizers (kg plant-1) |                      |                   |      |                  |                               |              |        |
|------------------|-----------|------------------------------------|----------------------|-------------------|------|------------------|-------------------------------|--------------|--------|
|                  | Treatment | Urea                               | Diammonium phosphate | Potassium sulfate | Lime | Mushroom residue | Magnesium sulfate monohydrate | Oyster shell | Gypsum |
| <b>Dec. 2018</b> | FFP       | 0.64                               | 0.84                 | 0.69              | 0    | 9.91             | 0                             | 0            | 0      |
|                  | O+C       | 0.13                               | 0                    | 0.13              | 0    | 2.57             | 0                             | 1.95         | 0.81   |
|                  | O+L+M     | 0.13                               | 0                    | 0.13              | 1.2  | 2.57             | 0                             | 0            | 0      |
|                  | O+L+Mg    | 0.17                               | 0                    | 0.15              | 1.2  | 0                | 0.06                          | 0            | 0      |
| <b>Feb. 2019</b> | FFP       | 0.42                               | 0.56                 | 0.46              | 0    | 0                | 0                             | 0            | 0      |
|                  | O+C       | 0.09                               | 0                    | 0.09              | 0    | 0                | 0                             | 0            | 0      |
|                  | O+L+M     | 0.09                               | 0                    | 0.09              | 0    | 0                | 0                             | 0            | 0      |
|                  | O+L+Mg    | 0.11                               | 0                    | 0.10              | 0    | 0                | 0.04                          | 0            | 0      |
| <b>Apr. 2019</b> | FFP       | 0.64                               | 0.84                 | 0.69              | 0    | 0                | 0                             | 0            | 0      |
|                  | O+C       | 0.13                               | 0                    | 0.13              | 0    | 0                | 0                             | 0            | 0      |
|                  | O+L+M     | 0.13                               | 0                    | 0.13              | 1.2  | 0                | 0                             | 0            | 0      |
|                  | O+L+Mg    | 0.17                               | 0                    | 0.15              | 1.2  | 0                | 0.06                          | 0            | 0      |
